# Supplementary material
Source: PubMed Central journal article supplement (PMC7941771)
Supplement: ee9-4-e0107-s001.pdf [file ee9-4-e0107-s001.pdf]

## Supplemental Digital Content I

for

**Title:** Per- and Polyfluoroalkyl Substances in Drinking Water and Birthweight in the US: A County-level Study

**Authors:** Yachen Zhu<sup>1</sup>, Scott M. Bartell<sup>1,2</sup>

Author affiliations:

1. Program in Public Health, University of California, Irvine, CA 92697-3957, USA
2. Department of Statistics, University of California, Irvine, CA 92697-1250, USA

Corresponding Author:

Yachen Zhu

Program in Public Health

Anteater Instruction & Research Building

Irvine, CA 92697-3957

USA

Email: [yachenz1@uci.edu](mailto:yachenz1@uci.edu)

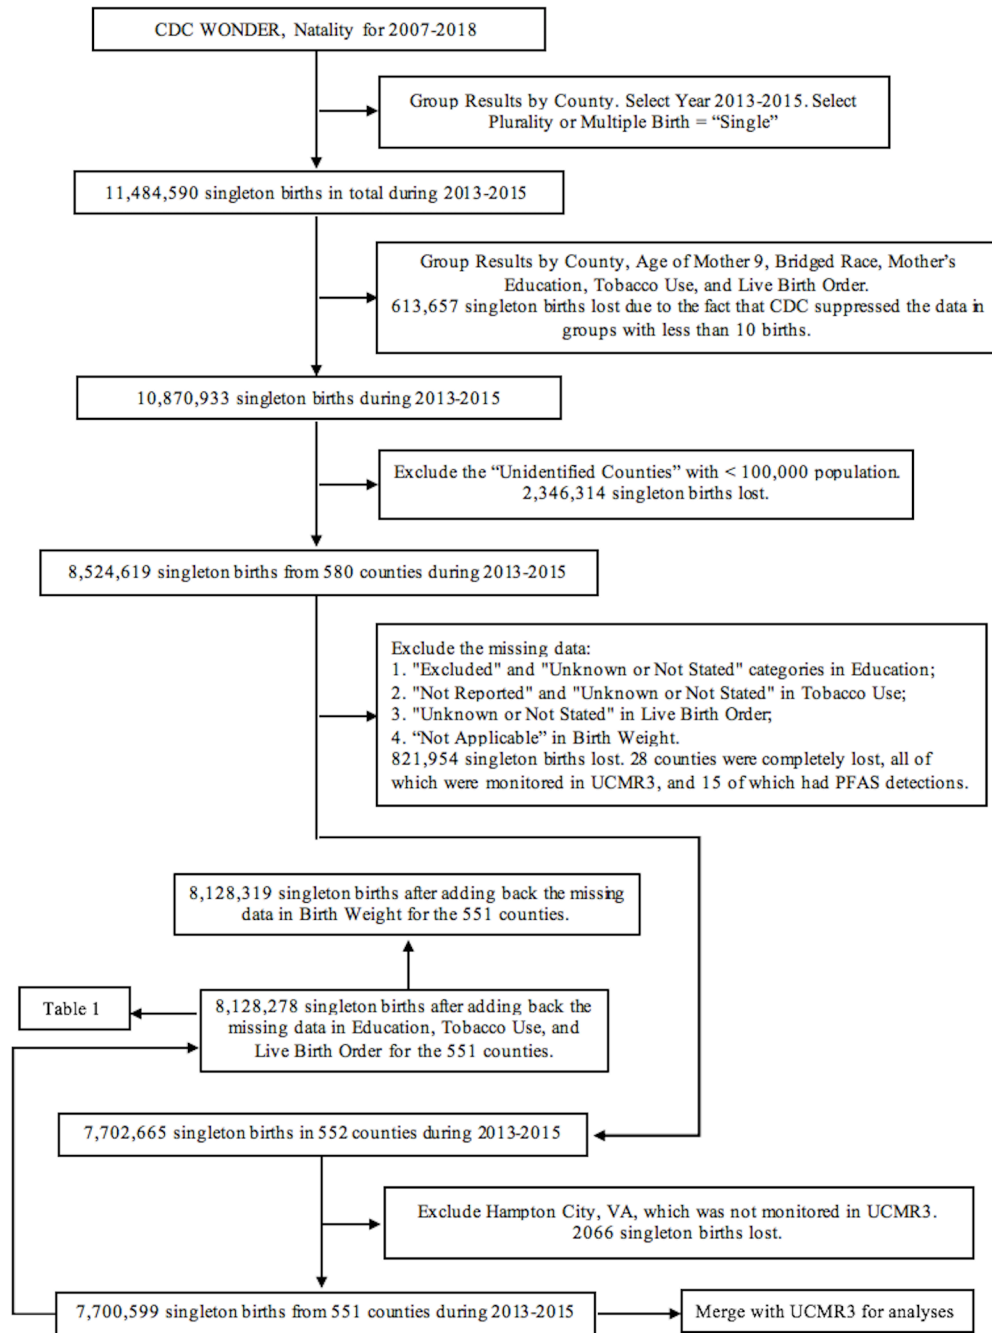

**Figure S1.** Study Profile

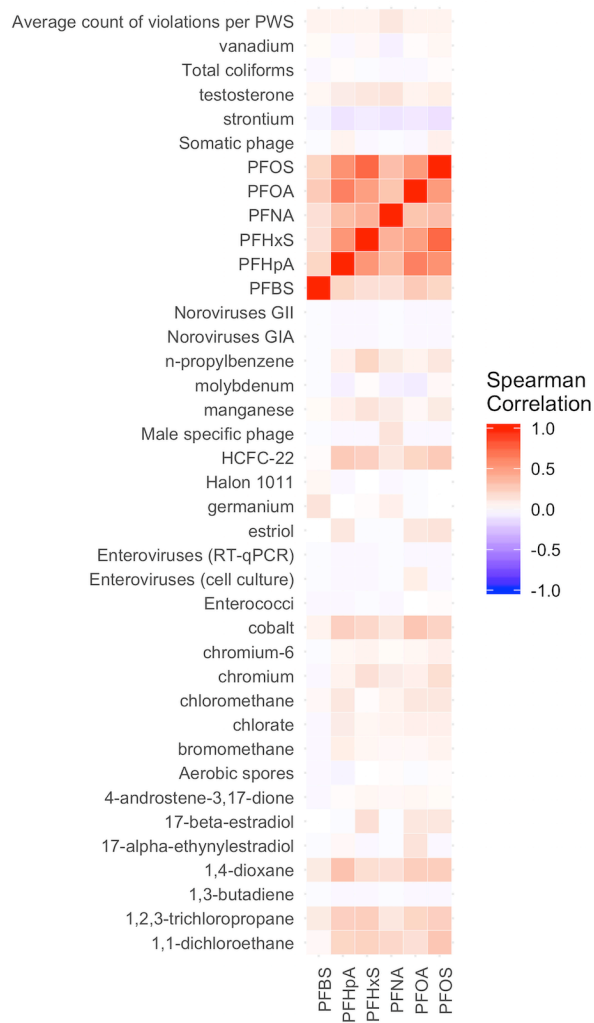

**Figure S2.** Spearman correlation heatmap between PFAS and other water quality indicators under the US EPA rules in 551 counties in the US, 2013-2015. Noroviruses GIA: Noroviruses genogroup I with RT-qPCR primer set A; Noroviruses GII: Noroviruses genogroup II. E. coli, equilin, estrone, Noroviruses GIB (genogroup I with RT-qPCR primer set B), sec-butylbenzene, and tellurium had no detections under UCMR3 and were excluded from the correlation heatmap.

Sensitivity Analyses:

Adjusted and adjusted co-exposure models in Figure S3 and Figure S4 additionally adjusted for the county-level percentage of poverty compared with those in Figure 1 and Figure 2 in the main text. Detailed effect estimates for the models in Figure S3 and Figure S4 can be found in Table S14 and Table S15.

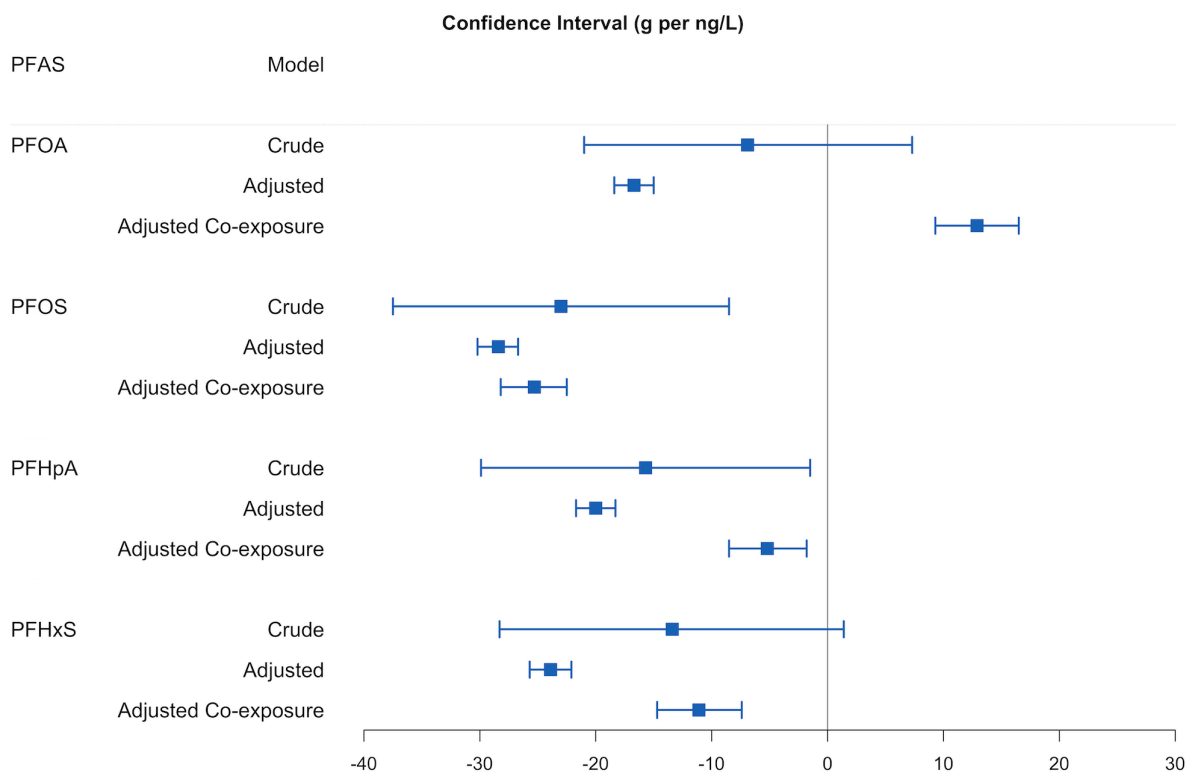

**Figure S3.** The change of average birthweight (g) for 10% increase in the detection of PFAS: MLE, 95% CI. Using regressions weighted by inverse variance of average birthweight. Crude model: association between PFAS and birthweight only. Adjusted model: adjusted for maternal age (<15, 15-19, 20-24, 25-29, 30-34, 35-39, 40-44, 45-49, ≥50), race (American Indian or Alaska Native, Asian or Pacific Islander, Black or African American, White), education (8th grade or less; 9th through 12th grade with no diploma; High school graduate or GED completed; Some college credit, but not a degree; Associate degree; Bachelor’s degree; Master’s degree; Doctorate or professional degree), smoking status (Yes, No), parity (1st, 2nd, 3rd and over), and county-level percentage of poverty. Adjusted co-exposure model: adjusted for the other three PFAS, 1,4-dioxane, and all covariates in the adjusted model.

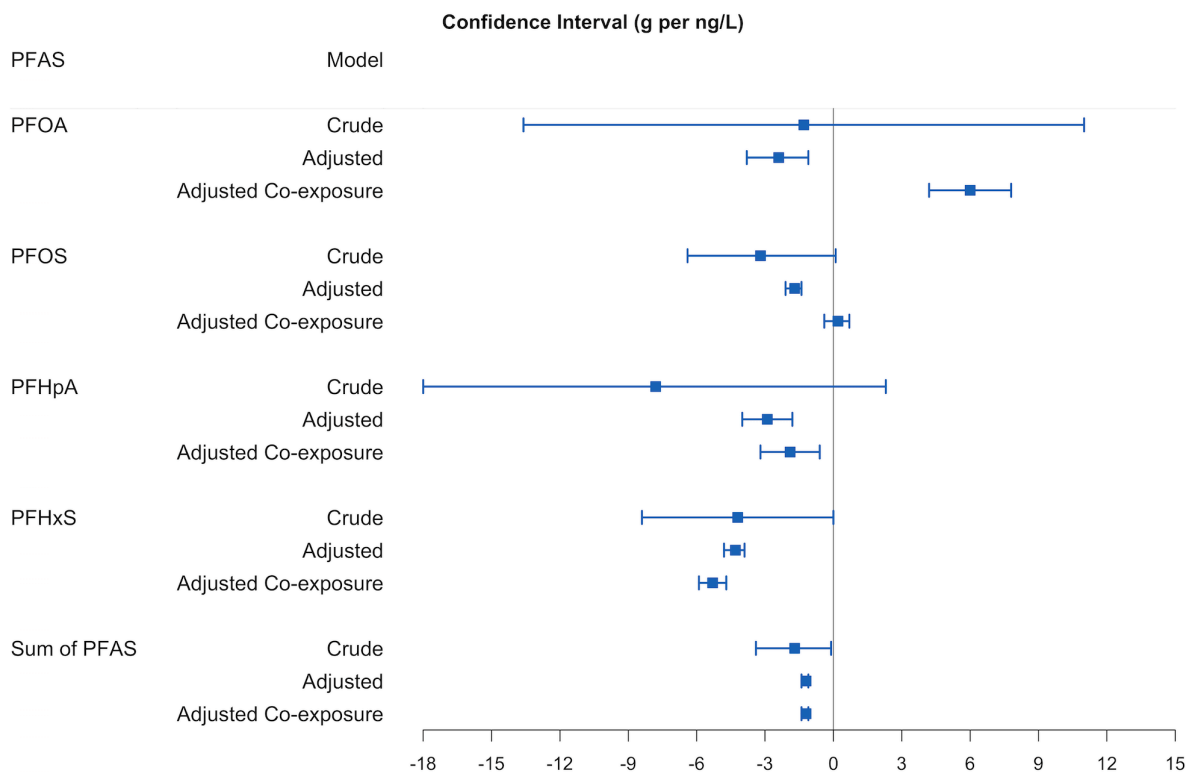

**Figure S4.** The change of average birthweight (g) for 1ng/L increase in the population-weighted average PFAS water concentration: MLE, 95% CI. Using  $\frac{MRL}{\sqrt{2}}$  substitution for the non-detections and regressions weighted by inverse variance of average birthweight. Crude model: association between PFAS and birthweight only. Adjusted model: adjusted for maternal age (<15, 15-19, 20-24, 25-29, 30-34, 35-39, 40-44, 45-49,  $\geq 50$ ), race (American Indian or Alaska Native, Asian or Pacific Islander, Black or African American, White), education (8th grade or less; 9th through 12th grade with no diploma; High school graduate or GED completed; Some college credit, but not a degree; Associate degree; Bachelor's degree; Master's degree; Doctorate or professional degree), smoking status (Yes, No), parity (1st, 2nd, 3rd and over), and county-level percentage of poverty. Adjusted co-exposure model: adjusted for the co-exposures (the other three PFAS and 1,4-dioxane; or 1,4-dioxane only for the model includes the sum of PFAS), and all covariates in the adjusted model.

**Table S1.** Number of Water Samples in 1,928 Counties Covered by UCMR3 in the US, 2013-2015

| Min  | 1 <sup>st</sup> Quantile | Median | Mean  | 3 <sup>rd</sup> Quantile | Max     | SD    |
|------|--------------------------|--------|-------|--------------------------|---------|-------|
| 1.00 | 4.00                     | 10.00  | 24.55 | 22.00                    | 1018.00 | 56.29 |

**Table S1.1.** Percentage of Water Measurements with Detection (%) of PFAS in 1,928 Counties Covered by UCMR3 in the US, 2013-2015

| Contaminant | Mean  | SD    | Min   | Max     |
|-------------|-------|-------|-------|---------|
| PFOA        | 0.68% | 4.27% | 0.00% | 100.00% |
| PFOS        | 0.36% | 3.24% | 0.00% | 100.00% |
| PFHpA       | 0.35% | 2.98% | 0.00% | 58.33%  |
| PFHxS       | 0.19% | 1.97% | 0.00% | 50.00%  |

**Table S1.2.** Population-weighted Average of UCMR3 Water Concentrations (ng/L) of PFAS in 162 Counties Covered by UCMR3 in the US with Detection of at least one of PFOA, PFOS, PFHpA, or PFHxS, 2013-2015. Values that were below the MRL were Substituted with  $\frac{MRL}{\sqrt{2}}$ .

| Contaminant | Mean  | SD   | Min   | Max    |
|-------------|-------|------|-------|--------|
| PFOA        | 15.64 | 4.25 | 14.14 | 63.60  |
| PFOS        | 30.63 | 6.01 | 28.28 | 80.64  |
| PFHpA       | 7.76  | 2.30 | 7.07  | 24.38  |
| PFHxS       | 22.76 | 7.06 | 21.21 | 104.11 |

**Table S2.** Number of Water Samples in the 551 Counties that can be Merged with CDC Birthweight Data in the US, 2013-2015

| Min  | 1 <sup>st</sup><br>Quantile | Median | Mean  | 3 <sup>rd</sup><br>Quantile | Max     | SD    |
|------|-----------------------------|--------|-------|-----------------------------|---------|-------|
| 2.00 | 15.50                       | 29.00  | 56.19 | 58.00                       | 1018.00 | 94.32 |

**Table S3.** Number of Water Samples in 87 Counties in the US with Detection of at least one of PFOA, PFOS, PFHpA or PFHxS, 2013-2015

| Min  | 1 <sup>st</sup><br>Quantile | Median | Mean   | 3 <sup>rd</sup><br>Quantile | Max     | SD     |
|------|-----------------------------|--------|--------|-----------------------------|---------|--------|
| 4.00 | 28.00                       | 50.00  | 127.00 | 136.50                      | 1018.00 | 187.73 |

**Table S4.** Predictors of Birthweight among Singleton Pregnancies in the US, 2013-2015

| Categories                                                     | No. of Births (%) | Average Birthweight (gram) (SD) |
|----------------------------------------------------------------|-------------------|---------------------------------|
| Total                                                          | 11,484,590 (100%) | 3,306 (561)                     |
| Maternal Age (years)                                           |                   |                                 |
| <15                                                            | 8,276 (0.07%)     | 3,076 (591)                     |
| 15-19                                                          | 739,856 (6.4%)    | 3,182 (550)                     |
| 20-24                                                          | 2,568,226 (22.4%) | 3,246 (549)                     |
| 25-29                                                          | 3,311,229 (28.8%) | 3,321 (551)                     |
| 30-34                                                          | 3,079,890 (26.8%) | 3,354 (559)                     |
| 35-39                                                          | 1,444,763 (12.6%) | 3,341 (585)                     |
| 40-44                                                          | 311,894 (2.7%)    | 3,292 (615)                     |
| 45-49                                                          | 19,046 (0.17%)    | 3,238 (648)                     |
| ≥50                                                            | 1,410 (0.01%)     | 3,188 (661)                     |
| Race                                                           |                   |                                 |
| American Indian or Alaska Native                               | 131,714 (1.1%)    | 3,342 (582)                     |
| Asian or Pacific Islander                                      | 803,171 (7.0%)    | 3,215 (516)                     |
| Black or African American                                      | 1,839,887 (16.0%) | 3,131 (610)                     |
| White                                                          | 8,709,818 (75.8%) | 3,350 (546)                     |
| Education                                                      |                   |                                 |
| 8 <sup>th</sup> grade or less                                  | 399,353 (3.5%)    | 3,306 (557)                     |
| 9 <sup>th</sup> through 12 <sup>th</sup> grade with no diploma | 1,242,484 (10.8%) | 3,205 (571)                     |
| High school graduate or GED completed                          | 2,703,542 (23.5%) | 3,256 (571)                     |
| Some college credit, but not a degree                          | 2,295,104 (20.0%) | 3,301 (569)                     |
| Associate degree                                               | 862,375 (7.5%)    | 3,346 (558)                     |
| Bachelor's degree                                              | 2,034,035 (17.7%) | 3,384 (533)                     |
| Master's degree                                                | 898,457 (7.8%)    | 3,384 (530)                     |
| Doctorate or professional degree                               | 256,032 (2.2%)    | 3,357 (518)                     |



|                          |                   |             |
|--------------------------|-------------------|-------------|
| Unknown or not stated    | 146,362 (1.3%)    | 3,256 (631) |
| Excluded                 | 646,846 (5.6%)    | 3,305 (558) |
| Smoking Status           |                   |             |
| No                       | 9,672,851 (84.2%) | 3,323 (556) |
| Yes                      | 870,235 (7.6%)    | 3,121 (578) |
| Not reported             | 774,075 (6.7%)    | 3,307 (560) |
| Unknown or not stated    | 167,429 (1.5%)    | 3,266 (604) |
| Parity                   |                   |             |
| 1 <sup>st</sup>          | 4,519,520 (39.4%) | 3,253 (566) |
| 2 <sup>nd</sup>          | 3,638,902 (31.7%) | 3,348 (540) |
| 3 <sup>rd</sup> and over | 3,269,850 (28.5%) | 3,331 (571) |
| Unknown or not stated    | 56,318 (0.5%)     | 3,245 (628) |

---

**Table S5.** Crude and Adjusted Associations between Percentage of Water Measurements with PFOA Detection and Average Birthweight among Singleton Live Births in 551 Counties, 2013-2015

| Model                        | The Change of Average Birthweight (g) for 10% Increase in the Detection of PFOA: MLE, 95% CI |                                                     |
|------------------------------|----------------------------------------------------------------------------------------------|-----------------------------------------------------|
|                              | Weighted by group size                                                                       | Weighted by inverse variance of average birthweight |
| Crude Model                  | -5.1, [-19.8, 9.5]                                                                           | -6.9, [-21.0, 7.3]                                  |
| Adjusted Model*              | -11.9, [-13.7, -10.1]                                                                        | -12.2, [-13.9, -10.5]                               |
| Adjusted Co-exposure Model** | 20.0, [16.3, 23.7]                                                                           | 19.9, [16.2, 23.6]                                  |

\* Adjusted for maternal age (<15, 15-19, 20-24, 25-29, 30-34, 35-39, 40-44, 45-49, ≥50), race (American Indian or Alaska Native, Asian or Pacific Islander, Black or African American, White), education (8th grade or less; 9th through 12th grade with no diploma; High school graduate or GED completed; Some college credit, but not a degree; Associate degree; Bachelor's degree; Master's degree; Doctorate or professional degree), smoking status (Yes, No), and parity (1st, 2nd, 3rd and over).

\*\* Adjusted for PFOS, PFHpA, PFHxS, 1,4-dioxane, and all covariates in the adjusted model.

**Table S6.** Crude and Adjusted Associations between Percentage of Water Measurements with PFOS Detection and Average Birthweight among Singleton Live Births in 551 Counties, 2013-2015

| Model                        | The Change of Average Birthweight (g) for 10% Increase in the Detection of PFOS: MLE, 95% CI |                                                     |
|------------------------------|----------------------------------------------------------------------------------------------|-----------------------------------------------------|
|                              | Weighted by group size                                                                       | Weighted by inverse variance of average birthweight |
| Crude Model                  | -22.1, [-37.1, -7.1]                                                                         | -23.0, [-37.5, -8.5]                                |
| Adjusted Model*              | -27.8, [-29.6, -26.0]                                                                        | -28.9, [-30.6, -27.1]                               |
| Adjusted Co-exposure Model** | -29.8, [-32.7, -26.8]                                                                        | -32.9, [-35.8, -30.0]                               |

\* Adjusted for maternal age (<15, 15-19, 20-24, 25-29, 30-34, 35-39, 40-44, 45-49, ≥50), race (American Indian or Alaska Native, Asian or Pacific Islander, Black or African American, White), education (8th grade or less; 9th through 12th grade with no diploma; High school graduate or GED completed; Some college credit, but not a degree; Associate degree; Bachelor’s degree; Master’s degree; Doctorate or professional degree), smoking status (Yes, No), and parity (1st, 2nd, 3rd and over).

\*\* Adjusted for PFOA, PFHpA, PFHxS, 1,4-dioxane, and all covariates in the adjusted model.

**Table S7.** Crude and Adjusted Associations between Percentage of Water Measurements with PFHpA Detection and Average Birthweight among Singleton Live Births in 551 Counties, 2013-2015

| Model                        | The Change of Average Birthweight (g) for 10% Increase in the Detection of PFHpA: MLE, 95% CI |                                                     |
|------------------------------|-----------------------------------------------------------------------------------------------|-----------------------------------------------------|
|                              | Weighted by group size                                                                        | Weighted by inverse variance of average birthweight |
| Crude Model                  | -14.3, [-28.9, 0.3]                                                                           | -15.7, [-29.9, -1.5]                                |
| Adjusted Model*              | -18.3, [-20.1, -16.5]                                                                         | -17.8, [-19.5, -16.0]                               |
| Adjusted Co-exposure Model** | -9.6, [-13.1, -6.0]                                                                           | -8.0, [-11.4, -4.6]                                 |

\* Adjusted for maternal age (<15, 15-19, 20-24, 25-29, 30-34, 35-39, 40-44, 45-49, ≥50), race (American Indian or Alaska Native, Asian or Pacific Islander, Black or African American, White), education (8th grade or less; 9th through 12th grade with no diploma; High school graduate or GED completed; Some college credit, but not a degree; Associate degree; Bachelor's degree; Master's degree; Doctorate or professional degree), smoking status (Yes, No), and parity (1st, 2nd, 3rd and over).

\*\* Adjusted for PFOA, PFOS, PFHxS, 1,4-dioxane, and all covariates in the adjusted model.

**Table S8.** Crude and Adjusted Associations between Percentage of Water Measurements with PFHxS Detection and Average Birthweight among Singleton Live Births in 551 Counties, 2013-2015

| Model                        | The Change of Average Birthweight (g) for 10% Increase in the Detection of PFHxS: MLE, 95% CI |                                                     |
|------------------------------|-----------------------------------------------------------------------------------------------|-----------------------------------------------------|
|                              | Weighted by group size                                                                        | Weighted by inverse variance of average birthweight |
| Crude Model                  | -12.2, [-27.8, 3.4]                                                                           | -13.4, [-28.3, 1.4]                                 |
| Adjusted Model*              | -19.7, [-21.5, -17.8]                                                                         | -19.9, [-21.7, -18.0]                               |
| Adjusted Co-exposure Model** | -6.0, [-9.9, -2.1]                                                                            | -5.0, [-8.8, -1.2]                                  |

\* Adjusted for maternal age (<15, 15-19, 20-24, 25-29, 30-34, 35-39, 40-44, 45-49, ≥50), race (American Indian or Alaska Native, Asian or Pacific Islander, Black or African American, White), education (8th grade or less; 9th through 12th grade with no diploma; High school graduate or GED completed; Some college credit, but not a degree; Associate degree; Bachelor's degree; Master's degree; Doctorate or professional degree), smoking status (Yes, No), and parity (1st, 2nd, 3rd and over).

\*\* Adjusted for PFOA, PFOS, PFHpA, 1,4-dioxane, and all covariates in the adjusted model.

**Table S9.** Crude and Adjusted Associations between Population-weighted Average PFOA Water Concentration and Average Birthweight among Singleton Live Births in 87 Counties, 2013-2015

| Model                         | The Change of Average Birthweight (g) for 1ng/L Increase in the Population-weighted Average PFOA Water Concentration: MLE, 95% CI* |                   |                     |
|-------------------------------|------------------------------------------------------------------------------------------------------------------------------------|-------------------|---------------------|
|                               | $\frac{MRL}{\sqrt{2}}$ substitution                                                                                                | Zero substitution | MRL substitution    |
| Crude Model                   | -1.3, [-13.6, 11.0]                                                                                                                | -1.1, [-9.0, 6.8] | -1.1, [-16.4, 14.3] |
| Adjusted Model**              | 0.9, [-0.5, 2.2]                                                                                                                   | 1.0, [0.1, 1.8]   | 0.4, [-1.3, 2.1]    |
| Adjusted Co-exposure Model*** | 10.7, [8.9, 12.6]                                                                                                                  | 6.7, [5.6, 7.7]   | 9.5, [7.1, 12.0]    |

\* Weighted by inverse variance of average birthweight.

\*\*Adjusted for maternal age (<15, 15-19, 20-24, 25-29, 30-34, 35-39, 40-44, 45-49, ≥50), race (American Indian or Alaska Native, Asian or Pacific Islander, Black or African American, White), education (8th grade or less; 9th through 12th grade with no diploma; High school graduate or GED completed; Some college credit, but not a degree; Associate degree; Bachelor's degree; Master's degree; Doctorate or professional degree), smoking status (Yes, No), and parity (1st, 2nd, 3rd and over).

\*\*\*Adjusted for PFOS, PFHpA, PFHxS, 1,4-dioxane, and all covariates in the adjusted model.

**Table S10.** Crude and Adjusted Associations between Population-weighted Average PFOS Water Concentration and Average Birthweight among Singleton Live Births in 87 Counties, 2013-2015

| Model                         | The Change of Average Birthweight (g) for 1ng/L Increase in the Population-weighted Average PFOS Water Concentration: MLE, 95% CI* |                    |                    |
|-------------------------------|------------------------------------------------------------------------------------------------------------------------------------|--------------------|--------------------|
|                               | $\frac{MRL}{\sqrt{2}}$ substitution                                                                                                | Zero substitution  | MRL substitution   |
| Crude Model                   | -3.2, [-6.4, 0.1]                                                                                                                  | -3.4, [-5.9, -0.9] | -2.4, [-6.0, 1.1]  |
| Adjusted Model**              | -1.3, [-1.6, -0.9]                                                                                                                 | -1.9, [-2.2, -1.6] | -0.6, [-1.0, -0.2] |
| Adjusted Co-exposure Model*** | 0.3, [-0.3, 0.9]                                                                                                                   | -1.0, [-1.5, -0.6] | 1.7, [1.0, 2.3]    |

\* Weighted by inverse variance of average birthweight.

\*\* Adjusted for maternal age (<15, 15-19, 20-24, 25-29, 30-34, 35-39, 40-44, 45-49, ≥50), race (American Indian or Alaska Native, Asian or Pacific Islander, Black or African American, White), education (8th grade or less; 9th through 12th grade with no diploma; High school graduate or GED completed; Some college credit, but not a degree; Associate degree; Bachelor’s degree; Master’s degree; Doctorate or professional degree), smoking status (Yes, No), and parity (1st, 2nd, 3rd and over).

\*\*\* Adjusted for PFOA, PFHpA, PFHxS, 1,4-dioxane, and all covariates in the adjusted model.

**Table S11.** Crude and Adjusted Associations between Population-weighted Average PFHpA Water Concentration and Average Birthweight among Singleton Live Births in 87 Counties, 2013-2015

| Model                         | The Change of Average Birthweight (g) for 1ng/L Increase in the Population-weighted Average PFHpA Water Concentration: MLE, 95% CI* |                    |                    |
|-------------------------------|-------------------------------------------------------------------------------------------------------------------------------------|--------------------|--------------------|
|                               | $\frac{MRL}{\sqrt{2}}$ substitution                                                                                                 | Zero substitution  | MRL substitution   |
| Crude Model                   | -7.8, [-18.0, 2.3]                                                                                                                  | -6.2, [-13.0, 0.7] | -8.3, [-20.9, 4.2] |
| Adjusted Model**              | -3.8, [-4.9, -2.7]                                                                                                                  | -3.3, [-4.1, -2.6] | -3.6, [-5.0, -2.2] |
| Adjusted Co-exposure Model*** | -4.8, [-6.3, -3.3]                                                                                                                  | -3.4, [-4.5, -2.3] | -3.9, [-5.7, -2.1] |

\* Weighted by inverse variance of average birthweight.

\*\* Adjusted for maternal age (<15, 15-19, 20-24, 25-29, 30-34, 35-39, 40-44, 45-49, ≥50), race (American Indian or Alaska Native, Asian or Pacific Islander, Black or African American, White), education (8th grade or less; 9th through 12th grade with no diploma; High school graduate or GED completed; Some college credit, but not a degree; Associate degree; Bachelor’s degree; Master’s degree; Doctorate or professional degree), smoking status (Yes, No), and parity (1st, 2nd, 3rd and over).

\*\*\* Adjusted for PFOA, PFOS, PFHxS, 1,4-dioxane, and all covariates in the adjusted model.



**Table S12.** Crude and Adjusted Associations between Population-weighted Average PFHxS Water Concentration and Average Birthweight among Singleton Live Births in 87 Counties, 2013-2015

| Model                         | The Change of Average Birthweight (g) for 1ng/L Increase in the Population-weighted Average PFHxS Water Concentration: MLE, 95% CI* |                    |                    |
|-------------------------------|-------------------------------------------------------------------------------------------------------------------------------------|--------------------|--------------------|
|                               | $\frac{MRL}{\sqrt{2}}$ substitution                                                                                                 | Zero substitution  | MRL substitution   |
| Crude Model                   | -4.2, [-8.4, 0.0]                                                                                                                   | -3.4, [-6.5, 0.2]  | -4.7, [-9.4, -0.1] |
| Adjusted Model**              | -3.8, [-4.3, -3.3]                                                                                                                  | -2.7, [-3.0, -2.3] | -4.4, [-4.9, -3.8] |
| Adjusted Co-exposure Model*** | -5.4, [-6.0, -4.7]                                                                                                                  | -2.6, [-3.1, -2.1] | -6.9, [-7.6, -6.3] |

\* Weighted by inverse variance of average birthweight.

\*\* Adjusted for maternal age (<15, 15-19, 20-24, 25-29, 30-34, 35-39, 40-44, 45-49, ≥50), race (American Indian or Alaska Native, Asian or Pacific Islander, Black or African American, White), education (8th grade or less; 9th through 12th grade with no diploma; High school graduate or GED completed; Some college credit, but not a degree; Associate degree; Bachelor's degree; Master's degree; Doctorate or professional degree), smoking status (Yes, No), and parity (1st, 2nd, 3rd and over).

\*\*\* Adjusted for PFOA, PFOS, PFHpA, 1,4-dioxane, and all covariates in the adjusted model.

**Table S13.** Crude and Adjusted Associations between the Sum of Population-weighted Average Water Concentrations of Four PFAS and Average Birthweight among Singleton Live Births in 87 Counties, 2013-2015

| Model                         | The Change of Average Birthweight (g) for 1ng/L Increase in the Sum of Population-weighted Average Water Concentrations of Four PFAS: MLE, 95% CI* |                    |                    |
|-------------------------------|----------------------------------------------------------------------------------------------------------------------------------------------------|--------------------|--------------------|
|                               | $\frac{MRL}{\sqrt{2}}$ substitution                                                                                                                | Zero substitution  | MRL substitution   |
| Crude Model                   | -1.7, [-3.4, -0.1]                                                                                                                                 | -1.6, [-2.9, -0.3] | -1.6, [-3.5, 0.2]  |
| Adjusted Model**              | -1.0, [-1.2, -0.8]                                                                                                                                 | -1.0, [-1.1, -0.8] | -0.9, [-1.1, -0.7] |
| Adjusted Co-exposure Model*** | -1.0, [-1.2, -0.8]                                                                                                                                 | -1.0, [-1.1, -0.8] | -0.9, [-1.1, -0.7] |

\* Weighted by inverse variance of average birthweight.

\*\* Adjusted for maternal age (<15, 15-19, 20-24, 25-29, 30-34, 35-39, 40-44, 45-49, ≥50), race (American Indian or Alaska Native, Asian or Pacific Islander, Black or African American, White), education (8th grade or less; 9th through 12th grade with no diploma; High school graduate or GED completed; Some college credit, but not a degree; Associate degree; Bachelor’s degree; Master’s degree; Doctorate or professional degree), smoking status (Yes, No), and parity (1st, 2nd, 3rd and over).

\*\*\* Adjusted for 1,4-dioxane and all covariates in the adjusted model

Sensitivity Analyses:

Adjusted and adjusted co-exposure models in Table S14 and Table S15 additionally adjusted for county-level percentage of poverty compared with those in the previous tables.

**Table S14.** Crude and Adjusted Associations between Percentage of Water Measurements with PFAS Detection and Average Birthweight among Singleton Live Births in 551 Counties, 2013-2015

| Model                         | The Change of Average Birthweight (g) for 10% Increase in the Detection of PFAS: MLE, 95% CI* |                          |                         |                          |
|-------------------------------|-----------------------------------------------------------------------------------------------|--------------------------|-------------------------|--------------------------|
|                               | PFOA                                                                                          | PFOS                     | PFHpA                   | PFHxS                    |
| Crude Model                   | -6.9,<br>[-21, 7.3]                                                                           | -23,<br>[-37.5, -8.5]    | -15.7,<br>[-29.9, -1.5] | -13.4,<br>[-28.3, 1.4]   |
| Adjusted Model**              | -16.7,<br>[-18.4, -15]                                                                        | -28.4,<br>[-30.2, -26.7] | -20,<br>[-21.7, -18.3]  | -23.9,<br>[-25.7, -22.1] |
| Adjusted Co-exposure Model*** | 12.9,<br>[9.3, 16.5]                                                                          | -25.3,<br>[-28.2, -22.5] | -5.2,<br>[-8.5, -1.8]   | -11.1,<br>[-14.7, -7.4]  |

\* Weighted by inverse variance of average birthweight.

\*\* Adjusted for maternal age (<15, 15-19, 20-24, 25-29, 30-34, 35-39, 40-44, 45-49, ≥50), race (American Indian or Alaska Native, Asian or Pacific Islander, Black or African American, White), education (8th grade or less; 9th through 12th grade with no diploma; High school graduate or GED completed; Some college credit, but not a degree; Associate degree; Bachelor's degree; Master's degree; Doctorate or professional degree), smoking status (Yes, No), parity (1st, 2nd, 3rd and over), and county-level percentage of poverty.

\*\*\* Adjusted for the other PFAS, 1,4-dioxane, and all covariates in the adjusted model.

**Table S15.** Crude and Adjusted Associations between Population-weighted Average PFAS Water Concentration and Average Birthweight among Singleton Live Births in 87 Counties, 2013-2015 (Using  $\frac{MRL}{\sqrt{2}}$  substitution)

| Model                         | The Change of Average Birthweight (g) for 1ng/L Increase in the Population-weighted Average PFAS Water Concentration: MLE, 95% CI* |                       |                       |                       |                       |
|-------------------------------|------------------------------------------------------------------------------------------------------------------------------------|-----------------------|-----------------------|-----------------------|-----------------------|
|                               | PFOA                                                                                                                               | PFOS                  | PFHpA                 | PFHxS                 | Sum of four PFAS      |
| Crude Model                   | -1.3,<br>[-13.6, 11]                                                                                                               | -3.2,<br>[-6.4, 0.1]  | -7.8,<br>[-18, 2.3]   | -4.2,<br>[-8.4, 0]    | -1.7,<br>[-3.4, -0.1] |
| Adjusted Model**              | -2.4,<br>[-3.8, -1.1]                                                                                                              | -1.7,<br>[-2.1, -1.4] | -2.9,<br>[-4, -1.8]   | -4.3,<br>[-4.8, -3.9] | -1.2,<br>[-1.4, -1.1] |
| Adjusted Co-exposure Model*** | 6,<br>[4.2, 7.8]                                                                                                                   | 0.2,<br>[-0.4, 0.7]   | -1.9,<br>[-3.2, -0.6] | -5.3,<br>[-5.9, -4.7] | -1.2,<br>[-1.4, -1.1] |

\* Weighted by inverse variance of average birthweight.

\*\* Adjusted for maternal age (<15, 15-19, 20-24, 25-29, 30-34, 35-39, 40-44, 45-49, ≥50), race (American Indian or Alaska Native, Asian or Pacific Islander, Black or African American, White), education (8th grade or less; 9th through 12th grade with no diploma; High school graduate or GED completed; Some college credit, but not a degree; Associate degree; Bachelor's degree; Master's degree; Doctorate or professional degree), smoking status (Yes, No), parity (1st, 2nd, 3rd and over), and county-level percentage of poverty.

\*\*\* Adjusted for the other PFAS, 1,4-dioxane, and all covariates in the adjusted model.

**Table S16.** Spearman Correlation between Percentage of Poverty and Percentage of Water Measurements with PFAS Detection for 551 Counties, 2013-2015

|       | Spearman correlation | p-value |
|-------|----------------------|---------|
| PFOA  | -0.07                | 0.09    |
| PFOS  | 0.02                 | 0.61    |
| PFHpA | -0.08                | 0.08    |
| PFHxS | -0.04                | 0.30    |

**Table S17.** Spearman Correlation between Percentage of Poverty and Population-weighted Average PFAS Water Concentrations for the 87 Counties with Detection of at least one of PFOA, PFOS, PFHpA, or PFHxS, 2013-2015

|       | Spearman correlation | p-value |
|-------|----------------------|---------|
| PFOA  | -0.18                | 0.10    |
| PFOS  | 0.04                 | 0.70    |
| PFHpA | -0.13                | 0.22    |
| PFHxS | -0.07                | 0.50    |

**Table S18.** Descriptive Statistics of Serum PFAS Concentrations (ng/ml) for the General US Population (Aged 12 Years and Older) from the National Health and Nutrition Examination Survey (NHANES).

|       | 2015-2016 cycle of NHANES |                   |                           |                          |
|-------|---------------------------|-------------------|---------------------------|--------------------------|
|       | Geometric Mean (95% CI)   | Median (95% CI)   | 25th Percentile (95% CI)* | 75th Percentile (95% CI) |
| PFOA  | 1.56 (1.47, 1.66)         | 1.57 (1.47, 1.77) | 1.07 (0.97, 1.17)         | 2.47 (2.27, 2.57)        |
| PFOS  | 4.72 (4.4, 5.07)          | 4.8 (4.4, 5.3)    | 2.8 (2.6, 3.0)            | 8.1 (7.3, 9.4)           |
| PFHxS | 1.18 (1.08, 1.30)         | 1.2 (1.1, 1.3)    | 0.7 (0.6, 0.8)            | 2.1 (1.8, 2.3)           |
| PFHpA | -                         | -                 | -                         | -                        |
| PFNA  | 0.58 (0.54, 0.62)         | 0.6 (0.5, 0.6)    | 0.4 (0.3, 0.4)            | 0.9 (0.8, 1.0)           |
| PFBS  | -                         | -                 | -                         | -                        |
|       | 2013-2014 cycle of NHANES |                   |                           |                          |
|       | Geometric Mean (95% CI)   | Median (95% CI)   | 25th Percentile (95% CI)* | 75th Percentile (95% CI) |
| PFOA  | 1.94 (1.76, 2.14)         | 2.07 (1.87, 2.20) | 1.37 (1.17, 1.47)         | 3.07 (2.67, 3.37)        |
| PFOS  | 4.99 (4.50, 5.52)         | 5.2 (4.8, 5.7)    | 3.1 (2.7, 3.4)            | 8.7 (8.0, 9.4)           |
| PFHxS | 1.35 (1.2, 1.52)          | 1.4 (1.2, 1.6)    | 0.8 (0.7, 0.9)            | 2.4 (2.2, 2.8)           |
| PFHpA | < LOD                     | < LOD             | < LOD                     | < LOD                    |
| PFNA  | 0.68 (0.61, 0.74)         | 0.7 (0.6, 0.7)    | 0.4 (0.4, 0.5)            | 1.0 (0.9, 1.2)           |
| PFBS  | < LOD                     | < LOD             | < LOD                     | < LOD                    |

Limit of detection (LOD) for serum PFAS in survey cycle 2013-2014 and 2015-2016 are 0.10 ng/ml (= 100 ng/L = 100 ppt).

< LOD means less than the limit of detection.

- Not measured.

\* The 25th percentile (95% CI) was not reported by CDC Fourth Report on Human Exposure to Environmental Chemicals (January 2019).<sup>7</sup> We calculated the statistics accounting for complex survey design using NHANES data and the ‘survey’ package in R. The other percentiles and geometric means are identical to the statistics reported by CDC.
